# Supplementary material for: Active transforming growth factor-β2 in the aqueous humor of posterior polymorphous corneal dystrophy patients
Source: PLoS One. 2017 Apr 17;12(4):e0175509. doi: 10.1371/journal.pone.0175509 (PMC5393593; doi:10.1371/journal.pone.0175509)
Supplement: S1 File — (XLSX) [file pone.0175509.s001.xlsx]

## Sheet: TGFbeta2
TGF-beta2 (pg/ml)
Controls	PPCD (all)	PPCD1	PPCD3	PPCDx	PPCD Glau (-)	PPCD Glau (+)	PPCD PK (+)	PPCD rePK
154	284	284	465	448	375	284	211	211
345	435	435		574	295	435	120	369
268	551	551		417	574	551	461	320
97	197	197		541	291	197	375	323
85	211	211			506	211	295	383
216.9	120	120			336	120	574	541
482	448	461			280	448	291	483
272.6	461	375			417	461	506
74	375	295			194	369	369
324	295	291			389	320	336
58	574	506			577	320	280
171	291	369			320	323	320
322	506	320			180	634	417
132	369	336			471	383	194
562	320	280			465	239	323
430	336	320			597	309	389
419	280	194			337	388	383
342.467	320	323			331		239
239	417	389			317		577
198	194	634			541		320
363	323	383			533		471
278.8	389	239			490		465
299	634	577			483		597
175	383	320			416		331
283	239	309			301		317
232	577	180					541
188	320	471					533
174	309	597					490
185	180	337					483
232	471	331					416
343	465	317					301
172	597	533					388
421	337	490
150	331	483
292.833	317	416
90.6875	541	301
362	533	388
356	490
394	483
360	416
388	301
346	388
438
377

## Sheet: Age
Age
Controls	PPCD (all)
59	59
80	54
70	41
77	62
61	60
60	62
58	74
58	51
51	17
50	69
56	27
58	16
77	22
61	63
40	74
40	23
62	47
55	58
54	21
59	45
52	68
51	70
63	55
59	18
20	48
72	29
26	72
65	80
66	80
72	56
51	45
57	42
62	81
80	37
54	22
75	35
79	43
57	27
64	24
70	50
70	17
70	61
66
66

## Sheet: Patients
Patient code	Right eye (R) Left eye (L)	rePK	PPCD type	TGF-beta2 (pg/ml)	PK (Penetrating keratoplasty) (yes/no)	Glaucoma (yes/no)
1	L		PPCD1	284	no	yes
2	L		PPCD1	435	no	yes
3	L		PPCD1	551	no	yes
4	R		PPCD1	197	no	yes
1	L	re 1	PPCD1	211	yes	yes
4	R		PPCD1	120	yes	yes
5	R		PPCDx	448	no	yes
6	R		PPCD1	461	yes	yes
7	L		PPCD1	375	yes	no
8	L		PPCD1	295	yes	no
9	R		PPCDx	574	yes	no
10	R		PPCD1	291	yes	no
11	L		PPCD1	506	yes	no
1	L	re 2	PPCD1	369	yes	yes
12	R		PPCD1	320	no	yes
11	R		PPCD1	336	yes	no
13	R		PPCD1	280	yes	no
2	R	re 1	PPCD1	320	yes	yes
14	R		PPCDx	417	yes	no
15	R		PPCD1	194	yes	no
4	R	re 1	PPCD1	323	yes	yes
16	L		PPCD1	389	yes	no
17	L		PPCD1	634	no	yes
18	R	re 1	PPCD1	383	yes	yes
19	R		PPCD1	239	yes	yes
20	L		PPCD1	577	yes	no
16	R		PPCD1	320	yes	no
21	L		PPCD1	309	no	yes
22	R		PPCD1	180	no	no
23	R		PPCD1	471	yes	no
24	R		PPCD3	465	yes	no
25	L		PPCD1	597	yes	no
22	L		PPCD1	337	no	no
26	L		PPCD1	331	yes	no
27	R		PPCD1	317	yes	no
9	R	re 1	PPCDx	541	yes	no
25	R		PPCD1	533	yes	no
7	R		PPCD1	490	yes	no
10	R	re 1	PPCD1	483	yes	no
28	R		PPCD1	416	yes	no
29	R		PPCD1	301	yes	no
23	L		PPCD1	388	yes	yes
Single sampling from patient
Repeated sampling from one patient from the same eye
Repeated sampling from one patient from right and left eye
re 1 - The first repeated penetrating keratoplasty
re 2 - The second repeated penetrating keratoplasty

## Sheet: Controls
Donor code	Donor - TGF beta2 (pg/ml)
1/R	154
2/R	345
3/R	268
4/R	97
5/L	85
6/R	216.9
7/R	482
7/L	272.6
8/L	74
9/RL	324
10/R	58
11/R	171
12/RL	322
13/R	132
14/R	562
14/L	430
15/RL	419
16/RL	342.467
17/RL	239
18/RL	198
19/RL	363
20/RL	278.8
21/RL	299
22/RL	175
23/RL	283
24/RL	232
25/RL	188
26/RL	174
27/RL	185
28/RL	232
29/R	343
30/R	172
31/RL	421
32/L	150
33/R	292.833
34/L	90.6875
35/L	362
36 /RL	356
37/ R	394
38/R	360
38/L	388
39/ R	346
40/R	438
40/L	377
Aqueous humor sample collected from right eye (R) or left eye (L) from the same donor
Aqueous humor sample collected from right eye (R) or left eye (L) from different donors
Aqueous humor sample pooled from right eye (R) and left eye (L) from the same donor
